# Depression and Glycemic Control in Elderly Ethnically Diverse Patients With Diabetes

## The IDEATel Project

PAULA M. TRIEF, PHD<sup>1</sup>  
 PHILIP C. MORIN, MS, CCRP<sup>3</sup>  
 ROBERTO IZQUIERDO, MD<sup>3</sup>  
 JEANNE A. TERESI, EDD, PHD<sup>4,5</sup>  
 JOSEPH P. EIMICKE, MS<sup>4</sup>

ROBIN GOLAND, MD<sup>6</sup>  
 JUSTIN STARREN, MD, PHD<sup>7</sup>  
 STEVEN SHEA, MD<sup>7,8</sup>  
 RUTH S. WEINSTOCK, MD, PHD<sup>2,3</sup>

**OBJECTIVE** — The purpose of the study was to investigate the effect of comorbid depression on glycemic control and on response to a telemedicine case management intervention for elderly, ethnically diverse diabetic patients.

**RESEARCH DESIGN AND METHODS** — Medicare beneficiaries in underserved areas were participants ( $n = 1,665$ ) in the Informatics for Diabetes Education and Telemedicine (IDEATel) project and randomized to a telemedicine case management intervention or usual care. The data analyzed include baseline demographics (age, sex, race/ethnicity, marital status, insulin use, years of education, years of diabetes, and pack-years smoked) and measures of glycemic control ( $HbA_{1c}$  [A1C]), comorbidity, diabetes symptom severity, functional disability and depression, and 1-year ( $n = 1,578$ ) A1C. The association between depression and glycemic control was analyzed cross-sectionally and prospectively.

**RESULTS** — At baseline, there was a significant correlation between depression and A1C and a trend for depression to predict A1C when other factors were controlled. However, in prospective analyses, depression did not predict change in A1C, either in the control or intervention group.

**CONCLUSIONS** — In this large sample of elderly diabetic patients, a weak relationship between depression and A1C was found, but depression did not prospectively predict change in glycemic control. Thus, there is no evidence that depression should be used to exclude patients from interventions. Also, we should evaluate the impact of depression on outcomes other than glycemic control.

*Diabetes Care* 29:830–835, 2006

Little is known about the impact of depression on elderly diabetic patients, a focus of this study. People with diabetes are twice as likely to be depressed as people without chronic disease

(1). Depression is a risk factor for onset of type 2 diabetes (2,3) and is associated with hyperglycemia, complications, smoking, mortality, and poorer adherence (4–8). There are conflicting findings

concerning depression and glycemic control (9–12) and whether treatment of depression results in improved glycemic control (13–15).

Although diabetes is a disease of advancing age, little is known about comorbid depression for elderly diabetic patients. Diabetes prevalence in the Medicare population increased 36%, and adjusted diabetes incidence increased 36.9% from 1993 to 2001 (16). It has been estimated that 20–25% of the elderly meet criteria for impaired glucose tolerance, and 20–30% have undiagnosed diabetes (17–19). The number of adults aged >65 years will double over the next 20–30 years, and the incidence of diabetes will dramatically increase (20,21). Given increases in life expectancy, many diabetic patients will experience complications and impaired physical and emotional quality of life (22,23). Prevalence estimates of comorbid depression and diabetes in the elderly range from 4.5% (24) to 16% (25), depending on samples, measures, and criteria. Finkelstein et al. (26) found that the diagnosed annual prevalence rate of major depression in the elderly increases with age, and comorbidity is associated with significantly greater health care utilization. Thus, the impact of depression on elderly diabetic patients is important to understand.

Analysis of data from the ELDER (Evaluating Long-Term Diabetes Self-Management Among Elder Rural Adults) Study found that depression related to sex, education, living arrangement, BMI, number of prescription medications, number of chronic conditions, and physical functioning (25). In another study, depression was actively addressed by a depression care manager, and elderly participants reported improvements in depressive symptoms, exercise adherence, and overall functioning but not in glycemic control (27). One purpose of this study was to assess the potential impact of depression on glycemic control for elderly diabetic patients.

It is a common clinical assumption that depression interferes with one's abil-

From the <sup>1</sup>Departments of Psychiatry and Medicine, State University of New York (SUNY) Upstate Medical University, Syracuse, New York; the <sup>2</sup>Department of Medicine, Veterans Affairs Medical Center, Syracuse, New York; the <sup>3</sup>Division of Endocrinology, Joslin Diabetes Center, SUNY Upstate Medical University, Syracuse, New York; the <sup>4</sup>Research Division, Hebrew Home for the Aged, Bronx, New York; the <sup>5</sup>Stroud Center, Columbia University, New York, New York; the <sup>6</sup>Naomi Berrie Diabetes Center, Columbia University, New York, New York; the <sup>7</sup>Department of Biomedical Informatics, Columbia University, New York, New York; and the <sup>8</sup>Departments of Medicine and Epidemiology, Columbia University, New York, New York.

Address correspondence and reprint requests to Paula M. Trief, PhD, SUNY Upstate Medical University, 750 E. Adams St., Syracuse, NY 13210. E-mail: triefp@upstate.edu.

Received for publication 20 September 2005 and accepted in revised form 19 December 2005.

J.S. has received grant/research support from LifeScan.

**Abbreviations:** CARE, Comprehensive Assessment and Referral Evaluation; CMMS, Center for Medicare and Medicaid Services; IDEATel, Informatics for Diabetes Education and Telemedicine; PCP, primary care provider.

A table elsewhere in this issue shows conventional and Système International (SI) units and conversion factors for many substances.

© 2006 by the American Diabetes Association.

The costs of publication of this article were defrayed in part by the payment of page charges. This article must therefore be hereby marked "advertisement" in accordance with 18 U.S.C. Section 1734 solely to indicate this fact.

ity to benefit from diabetes interventions, and depressed individuals are frequently excluded from intervention efficacy trials. However, to our knowledge, this assumption has never been tested. A second purpose of the study was to assess the impact of depression on the glycemic control outcomes of a case management intervention. We hypothesized that depression would result in poorer outcomes. In addition, as depression can promote unhealthy lifestyle behaviors (e.g., weight gain, smoking), we hypothesized that depression would also predict poorer outcomes for usual care participants.

## RESEARCH DESIGN AND METHODS

Subjects were participants in the Informatics for Diabetes Education and Telemedicine (IDEATel) project (28,29), a demonstration project funded by the Center for Medicare and Medicaid Services (CMMS). Medicare beneficiaries with diabetes living in medically underserved areas were enrolled to evaluate the feasibility, effectiveness, and cost-effectiveness of telemedicine with this population. Subjects were recruited through primary care providers (PCPs) in urban and rural medically underserved areas and were included if they were  $\geq 55$  years of age, receiving Medicare, and had diabetes (defined by physician's diagnosis and being treated with diet, oral hypoglycemic agents, or insulin). Excluded were those who had moderate/severe cognitive, visual, or physical impairments or severe comorbid disease. Subjects were randomized to a telemedicine case management intervention or usual care. Intervention subjects received a home telemedicine unit, i.e., a web-enabled computer used to upload blood pressure and blood glucose measurements, to videoconference with a nurse case manager and dietitian, and to access individualized graphic data displays and educational materials. The nurse case managers provided diabetes education and, under the supervision of an endocrinologist, treatment planning and consultation to PCPs who maintained treatment decision authority for their patients. A separate team of trained research nurses conducted physical and psychosocial assessments at baseline and 1-year follow-up. Over the 1st year of involvement, the mean number of home televisits ( $\sim 30$  min, every 2–6 weeks depending on glycemic control) was  $28.3 \pm 15.2$  (median 28), with a mean number of blood glucose uploads (560.2) and blood pressure uploads

(184.6) indicating intensive program involvement. The data analyzed for the present study includes baseline ( $n = 1,665$ ) subject demographics (age, sex, race/ethnicity, marital status, insulin use, education, years of diabetes, and pack-years smoked) and measures of glycemic control, comorbidity, diabetes symptom severity, functional disability and depression, and 1-year ( $n = 1,578$ ) measure of glycemic control. Although depression was measured at baseline, it was not used as an exclusion criterion.

## Measures

**SHORT-Comprehensive Assessment and Referral Evaluation Depression Scale (30,31).** The SHORT-Comprehensive Assessment and Referral Evaluation (CARE) Depression Scale is a brief version of the CARE and measures depression in the elderly and is chosen for IDEATel because it has been used with ethnically diverse populations. Internal consistency reliability estimates were 0.87 for development samples, and interrater reliability was 0.94 (32). Cronbach's  $\alpha$  for the current sample was 0.86. The evidence for concurrent validity was high (e.g., correlation of 0.75 with diagnosis) (33). The SHORT-CARE includes diagnostic items that correspond to DSM criteria, and cut scores have been developed for classification of depression (31). A cutoff of seven yields the highest sensitivity and specificity for clinical depression (34).

**Charlson Comorbidity Index (35).** The Charlson Comorbidity Index is a 17-item self-report of medical conditions. Weights (0–6) are assigned to various conditions reported. The weights are then added with an algorithm to ensure that the same condition is represented only once. It correlates significantly with short-term outcomes (36,37).

**Type 2 Diabetes Symptom Checklist.** The Type 2 Diabetes Symptom Checklist assesses six dimensions of diabetes-related symptoms: hyperglycemic, hypoglycemic, ophthalmologic, psychologic, cardiovascular, and neuropathic (38). Test-retest reliability ranged from 0.79 to 0.94. Internal consistency estimates ranged from 0.76 to 0.95. Cronbach's  $\alpha$  for the current sample was 0.91.

**The Activities of Daily Living Scale of the CARE.** The Activities of Daily Living Scale of the CARE is a measure of functional disabilities used to assess elderly individuals of different races, ethnicities, and community settings (30,39,40). Con-

current and predictive validity is good (32,33). Cronbach  $\alpha$  for the development sample were 0.84–0.95, and for the current sample it was 0.93.

Glycemic control was measured using HbA<sub>1c</sub> (A1C) analyzed by boronate affinity chromatography with the Primus CLC 383 (Primus, Kansas City, MO).

## Statistical analyses

IDEATel participants were enrolled through 700 PCPs (325 downstate and 375 upstate) and randomized within the practice. Therefore, all statistical analyses were adjusted for clustering within the PCP practices.

Variables included as covariates were age, sex, race/ethnicity, marital status, years of education, years of diabetes, insulin use, pack-years smoked, comorbidity, functional disability, and diabetes symptom severity. Variables were included based on clinical importance and preliminary analysis. Pearson's correlation and  $t$  tests were used to determine significant associations between the possible covariates and baseline measures of depression and glycemic control. Variables were included as covariates if they had a  $P$  value of  $\leq 0.10$  with the baseline data. Variables included in the baseline models were also included in the 1-year outcome models.

The primary analysis was of the relationship between baseline subject variables and outcome measures, with depression as the main independent variable and change in A1C (1-year A1C controlling for baseline A1C) as the outcome variable. To perform prospective analyses, a mixed-model approach with random effect to adjust for clustering within the PCP practice was implemented, using the SAS PROC MIXED. Variance components covariance structure was used in all analyses. Each analysis controlled for baseline A1C and all subject variables, including functional disability and comorbidity, two factors that are critical to outcomes of the elderly.

## RESULTS

### IDEATel recruitment and retention

Of 9,597 potential subjects assessed for eligibility, 929 were excluded by CMMS (e.g., not in CMMS system, died), and 6,467 were excluded for other reasons (e.g., refused, too sick, did not have diabetes, PCP refused). Telephone screens were accomplished for 2,201 individuals, 235 were excluded (e.g., vision, cognitive

**Table 1—Descriptive statistics of the subject sample**

|                                                | n            | Means ± SD  |
|------------------------------------------------|--------------|-------------|
| Age                                            | 1,665        | 70.8 ± 6.6  |
| Years of education                             | 1,663        | 9.8 ± 4.1   |
| Years since diagnosed with diabetes            | 1,646        | 11.1 ± 9.4  |
| Pack-years smoked                              | 1,636        | 19.9 ± 32.5 |
| Charlson Comorbidity Index                     | 1,663        | 2.9 ± 1.9   |
| Type 2 Symptom Severity Score                  | 1,662        | 31.3 ± 19.2 |
| Function-ADL                                   | 1,663        | 6.3 ± 6.6   |
| Depression                                     | 1,663        | 5.7 ± 4.8   |
| A1C                                            | 1,631        | 7.4 ± 1.5   |
|                                                | n (%)        |             |
| Sex                                            |              |             |
| Male                                           | 619 (37.2)   |             |
| Female                                         | 1,046 (62.8) |             |
| Single/never married                           |              |             |
| No                                             | 1,470 (88.4) |             |
| Yes                                            | 193 (11.6)   |             |
| Participant takes insulin to control diabetes? |              |             |
| No                                             | 1,173 (70.5) |             |
| Yes                                            | 491 (29.5)   |             |
| Race/ethnicity                                 |              |             |
| African American                               | 248 (14.9)   |             |
| Hispanic                                       | 586 (35.2)   |             |
| White (non-Hispanic)                           | 821 (49.4)   |             |
| Other                                          | 8 (0.5)      |             |

Function-ADL: SHORT-CARE Activities of Daily Living scale. Depression: SHORT-CARE Depression scale.

impairment), and 301 were not randomized (e.g., changed minds), leaving 1,665 randomized (844 intervention, 821 usual care). For prospective analyses, 105 usual care and 201 intervention subjects dropped out or were lost to follow-up. Subjects who completed the 1-year exam did not differ significantly from those who did not on age, race/ethnicity, sex, or baseline medical data. The baseline demographic and clinical data did not differ for the intervention and control groups (Table 1).

### IDEATel 1-year results

Detailed analyses of the results of the IDEATel project have been reported (41). Limited data are provided here in order to provide a context for this study. Mean A1C decreased in the intervention group from 7.35 to 6.97% and in the control group from 7.42 to 7.17%. When comparing these group changes, the net adjusted reduction was 0.18% ( $P = 0.006$ ). When the data from the subgroup of sub-

jects with baseline A1C >7% were analyzed, these differences were greater, showing a net adjusted reduction of 0.32% ( $P = 0.002$ ) of intervention versus control subjects.

### Baseline correlates of depression

See Table 2. There was a significant correlation between depression and A1C ( $r = 0.104$ ), indicating that depression was associated with poorer glycemic control at baseline. Subjects reporting more depressive symptoms were younger ( $r = -0.159$ ), female ( $t = 0.210$ ), Caucasian or Hispanic ( $t = 0.284$ ), never married ( $t = 0.050$ ), less educated ( $r = -0.207$ ), insulin users ( $t = 0.084$ ), heavier smokers ( $r = 0.061$ ), and reported more medical comorbidities ( $r = 0.218$ ) and more diabetes-related symptoms ( $r = 0.284$ ).

### Baseline predictors of glycemic control

Table 3 provides data on the relationship between baseline depressive symptoms and A1C. In each analysis, all other covariates were controlled. There was a trend for depression to predict baseline A1C (estimate = 0.026). Other predictors of higher A1C were being Caucasian (estimate = 0.803), male (estimate =

−0.172), using insulin (estimate = 0.476), having more years of education (estimate = 0.013), having more years of diabetes (estimate = 0.016), having more diabetes symptoms (estimate = 0.006), and having poorer activity of daily living function (estimate = 0.047).

### Prospective analyses of depression as a predictor of glycemic control

Depression was examined using three different measurement approaches (Table 4). In each analysis, we also examined whether the two groups, intervention and control, differed in whether depression predicted A1C (depression × group interaction term), and we ran separate analyses for the two groups to further assess this issue.

The first analysis was of depressive symptoms, treated as a continuous variable, predicting change in A1C (controlling for baseline A1C and other subject variables). Baseline depressive symptoms did not predict change in A1C (estimate = 0.016,  $P > 0.350$ ), neither for the control (estimate = 0.001,  $P > 0.911$ ) nor intervention (estimate = −0.003,  $P > 0.769$ ) group.

Next, depression was treated as a dichotomous variable, and the cutoff score

**Table 2—Baseline correlates and mean group differences of baseline depressive symptoms (SHORT-CARE)**

|                                | SHORT-CARE   | P value  |
|--------------------------------|--------------|----------|
| Age                            | $r = -0.159$ | <0.001   |
| Years of education             | $r = -0.207$ | <0.001   |
| Years of diabetes              | $r = 0.010$  | 0.70     |
| Smoking pack-years             | $r = -0.037$ | 0.13     |
| Comorbidity                    | $r = 0.218$  | <0.001   |
| Diabetes symptom severity      | $r = 0.555$  | <0.001   |
| Function-ADL                   | $r = 0.480$  | <0.001   |
| Glycemic control (A1C)         | $r = 0.104$  | <0.001   |
|                                | Mean ± SD    | P value* |
| Sex                            |              |          |
| Male                           | 4.37 ± 4.16  | <0.001   |
| Female                         | 6.44 ± 4.95  |          |
| Race/ethnicity                 |              |          |
| Black/Hispanic/other           | 6.85 ± 5.39  | <0.001   |
| White                          | 4.47 ± 3.69  |          |
| Marital status                 |              |          |
| Other (married, widowed, etc.) | 5.58 ± 4.73  | 0.04     |
| Single/never married           | 6.33 ± 5.06  |          |
| Insulin use                    |              |          |
| No                             | 5.41 ± 4.70  | 0.001    |
| Yes                            | 6.29 ± 4.90  |          |

Diabetes symptom severity: higher score = more severe symptoms. Glycemic control: higher percent = poorer glycemic control.  $r$  = Pearson correlation coefficient. \* $t$  test. Function-ADL: SHORT-CARE Activities of Daily Living scale.

**Table 3—Mixed-model\* analyses of baseline subject covariates and depressive symptoms as predictors of baseline glycemic control (A1C)**

|                    | A1C†<br>(n = 1,578) |       |              |
|--------------------|---------------------|-------|--------------|
|                    | Estimate            | SE    | Significance |
| Constant           | 7.077               | 0.447 | <0.0001      |
| Race/ethnicity     | 0.803               | 0.132 | <0.0001      |
| Age                | −0.006              | 0.006 | 0.288        |
| Sex                | −0.172              | 0.076 | 0.024        |
| Marital status     | 0.109               | 0.123 | 0.372        |
| Education          | 0.013               | 0.011 | 0.226        |
| Years of diabetes  | 0.016               | 0.004 | 0.000        |
| Insulin            | 0.476               | 0.089 | <0.0001      |
| Smoking pack-years | 0.001               | 0.001 | 0.544        |
| Comorbidity        | −0.014              | 0.020 | 0.467        |
| Symptom severity   | 0.006               | 0.003 | 0.012        |
| Function-ADL       | −0.014              | 0.007 | 0.047        |
| Depression         | 0.026               | 0.014 | 0.066        |
| Depression × race  | −0.024              | 0.017 | 0.149        |

Sex: 1 = male; 2 = female. Race: 1 = white; 0 = black/Hispanic/other. Marital status: 1 = single/never married; 0 = other (married, widowed, etc.). Insulin use: 1 = yes; 0 = no. Diabetes symptom severity: higher score = more severe symptoms. Comorbidity: Charlson Index, higher score = more comorbid conditions. Function-ADL: SHORT-CARE Activities of Daily Living scale. Depression: SHORT-CARE Depression scale. \*Adjusted for clustering within PCP. PCP was treated as a random effect. Variance components covariance structure used. Each analysis controlled for all other covariates. †Adjusted for group heterogeneity in cluster and residual variances.

of seven was used to define depressed versus not-depressed groups, as recommended (34). At baseline, 31.7% (n = 528) exceeded the cutoff, while at fol-

low-up 27.8% (n = 393) did so. Baseline depression did not predict change in A1C (estimate = 0.164,  $P > 0.105$ ), neither for the control (estimate = 0.166,  $P >$

0.164) nor intervention (estimate = 0.141,  $P > 0.156$ ) group.

Finally, depression was defined as use of antidepressant medication. A study of the Diabetes Prevention Program research group found that individuals who take antidepressant medications often have a diagnosis of depression but do not have higher depression measure scores, and they argue for using this factor as a marker of depression (42). At baseline, antidepressant use did not correlate with any of the medical variables. In prospective analyses, depression did not predict change in A1C (estimate = −0.101,  $P > 0.293$ ), neither for the control (estimate = −0.040,  $P > 0.754$ ) nor intervention (estimate = 0.053,  $P > 0.641$ ) group.

In all analyses, racial/ethnic groups did not differ on whether depression was a predictor of change in A1C. There were three factors that did predict glycemic control: age (older subjects had lower 1-year A1C), race (Caucasian subjects had higher 1-year A1C), and insulin use (insulin users had higher 1-year A1C).

**CONCLUSIONS** — In this large sample of elderly diabetic patients, we did not find evidence that depression prospectively predicts change in glycemic control, neither for the group that participated in the IDEATel intervention

**Table 4—Predicting follow-up A1C from baseline covariates using three markers of depression, controlling for covariates, and adjusted for PCP clustering\***

|                              | Depression             |       |              |                         |        |              |                             |        |              |
|------------------------------|------------------------|-------|--------------|-------------------------|--------|--------------|-----------------------------|--------|--------------|
|                              | Continuous (n = 1,320) |       |              | Dichotomous (n = 1,320) |        |              | Antidepressants (n = 1,312) |        |              |
|                              | Estimate               | SE    | Significance | Estimate                | SE     | Significance | Estimate                    | SE     | Significance |
| Constant                     | 4.372                  | 0.387 | <0.0001      | 4.328                   | 0.3859 | <0.0001      | 4.3751                      | 0.386  | <0.0001      |
| Baseline A1C                 | 0.430                  | 0.020 | <0.0001      | 0.429                   | 0.020  | <0.0001      | 0.4283                      | 0.020  | <0.0001      |
| Group (experimental/control) | 0.156                  | 0.088 | 0.076        | 0.150                   | 0.068  | 0.028        | 0.179                       | 0.0625 | 0.004        |
| Race/ethnicity               | 0.201                  | 0.079 | 0.011        | 0.180                   | 0.078  | 0.022        | 0.196                       | 0.079  | 0.013        |
| Age                          | −0.008                 | 0.005 | 0.085        | −0.007                  | 0.005  | 0.114        | −0.008                      | 0.005  | 0.076        |
| Sex                          | −0.027                 | 0.062 | 0.667        | −0.035                  | 0.061  | 0.575        | −0.022                      | 0.062  | 0.727        |
| Marital status               | −0.065                 | 0.088 | 0.461        | −0.061                  | 0.088  | 0.493        | −0.068                      | 0.089  | 0.444        |
| Years of education           | 0.000                  | 0.008 | 0.994        | 0.001                   | 0.008  | 0.938        | 0.000                       | 0.008  | 0.980        |
| Years of diabetes            | 0.004                  | 0.004 | 0.226        | 0.005                   | 0.004  | 0.193        | 0.005                       | 0.004  | 0.188        |
| Insulin use                  | 0.222                  | 0.072 | 0.002        | 0.219                   | 0.072  | 0.002        | 0.224                       | 0.072  | 0.002        |
| Smoking pack-years           | −0.001                 | 0.001 | 0.46         | −0.001                  | 0.001  | 0.517        | −0.001                      | 0.001  | 0.462        |
| Comorbidity                  | 0.000                  | 0.017 | 0.997        | −0.001                  | 0.017  | 0.972        | 0.001                       | 0.017  | 0.975        |
| Diabetes symptom severity    | 0.003                  | 0.002 | 0.131        | 0.002                   | 0.002  | 0.371        | 0.003                       | 0.002  | 0.126        |
| Function-ADL                 | −0.006                 | 0.005 | 0.251        | −0.009                  | 0.005  | 0.095        | −0.007                      | 0.005  | 0.203        |
| Depression                   | −0.002                 | 0.009 | 0.809        | 0.142                   | 0.093  | 0.124        | 0.054                       | 0.112  | 0.627        |
| Depression × group           | 0.000                  | 0.012 | 0.975        | −0.006                  | 0.123  | 0.964        | −0.148                      | 0.162  | 0.360        |

Marital status: 1 = subject single/never married; 0 = other (married, widowed, etc.). Years of diabetes: number of years since you were diagnosed with diabetes. Function-ADL: SHORT-CARE Activities of Daily Living scale. Depression: SHORT-CARE Depression scale. Antidepressants: participant takes antidepressant medications (0 = no; 1 = yes). \*Adjusted for clustering within PCP and group heterogeneity in cluster and residual variances. Variance components covariance structure used.



nor for those who received usual care. Whether we defined depression as a continuous variable (i.e., number and severity of depressive symptoms), as a dichotomous variable (i.e., depressed/not depressed), or as use of antidepressants, baseline depression did not predict change in A1C. We note that IDEATel did not target depression as a primary outcome, nor were patients systematically excluded due to depression scores, although PCPs may have screened out their more depressed patients before telephone screen.

We hypothesized that depressed patients would derive less benefit from the intervention, as the hopelessness/helplessness of depression might interfere with taking an active health care role. We did not find this to be the case. We also hypothesized that depressed patients receiving usual care would demonstrate poorer glycemic control 1 year later; this hypothesis was not supported.

Participants reported more depressive symptoms if they were female, never married, less educated, heavier smokers, had more comorbid medical conditions, and poorer glycemic control, findings similar to other reports (9,12). This supports the findings of relationships between depression and varied negative outcomes, confirms the limited research on the impact of depression on the elderly, and extends the data to an ethnically diverse sample of elders, a group that is often underrepresented in research.

Studies that have explored the relationship between depression and glycemic control have yielded inconclusive findings. While we did find a significant baseline relationship, this became a trend when other variables were controlled; thus, the relationship was not strong. If a stronger relationship exists, it may have been masked by limited variability in glycemic control or depression. However, in light of a recent population-based study that found no relationship between depression and hyperglycemia when comorbid diseases were controlled (12), one might reasonably conclude that the relationship between depression and glycemic control is a weak one for this sample of elderly individuals. We do not know if results would have been different for other age-groups.

There are several limitations of the study. As noted earlier, the limited variability in A1C or depression might have masked a relationship between the two. We used a self-report measure of depression that may not have been sufficiently

sensitive. Also, we do not have information about the individuals who were excluded before the telephone screen, other than knowing that they were significantly older (though still elderly) than the final sample (73.9 vs. 70.8 years mean age). Finally, ~36% of the drop-outs ( $n = 306$ ), as compared with 31.7% of the participants, scored above the cutoff for clinical depression. The possibility that PCPs may have excluded their most depressed patients and that a greater percentage of subjects lost to follow-up were depressed may have affected our ability to find a relationship between depression and follow-up A1C.

Without evidence to the contrary, depression should not be used to exclude elderly patients from participation in interventions that target medical outcomes. Future research should assess the impact of depression on outcomes other than glycemic control. Finally, further research should specifically focus on the elderly with comorbid depression and diabetes, given the paucity of research with this ever-growing group.

## References

1. Anderson RJ, Freedland KE, Clouse RE, Lustman PJ: The prevalence of comorbid depression in adults with diabetes: a meta-analysis. *Diabetes Care* 24:1069–1078, 2001
2. Eaton WW, Armenian HA, Gallo J, Pratt L, Ford DE: Depression and risk for onset of type II diabetes: a prospective, population-based study. *Diabetes Care* 19:1097–1102, 1996
3. Everson-Rose SA, Meyer PM, Powell LH, Pandey D, Torrens JI, Kravitz HM, Bromberger JT, Matthews KA: Depressive symptoms, insulin resistance, and risk of diabetes in women at midlife. *Diabetes Care* 27:2856–2862, 2004
4. Clouse RE, Lustman PJ, Freedland KE, Griffith LS, McGill JB, Carney RM: Depression and coronary heart disease in women with diabetes. *Psychosom Med* 65:376–383, 2003
5. DeGroot M, Anderson RJ, Freedland KE, Clouse RE, Lustman PJ: Association of depression and diabetes complications: a meta-analysis. *Psychosom Med* 63:619–630, 2001
6. Lustman PJ, Anderson RJ, Freedland KE, DeGroot MK, Carney RM, Clouse RE: Depression and poor glycemic control: a meta-analytic review of the literature. *Diabetes Care* 23:934–942, 2000
7. Lin EHB, Katon W, VonKorff M, Rutter C, Simon GE, Oliver M, Ciechanowski P, Ludman EJ, Bush T, Young B: Relationship of depression and diabetes self-care, medication adherence and preventive care. *Diabetes Care* 27:2154–2160, 2004
8. Egede LE, Nietert PJ, Zheng D: Depression and all-cause and coronary heart disease mortality among adults with and without diabetes. *Diabetes Care* 28:1339–1345, 2005
9. Katon W, von Korff M, Ciechanowski P, Russo J, Lin E, Simon G, Ludman E, Walker E, Bush T: Behavioral and clinical factors associated with depression among individuals with diabetes. *Diabetes Care* 27:914–920, 2004
10. Ciechanowski PS, Katon WH, Russo JE: Depression and diabetes: impact of depressive symptoms on adherence, function, and costs. *Arch Intern Med* 160:3278–3285, 2000
11. Singh PK, Looker HC, Hanson RL, Krakoff J, Bennett PH, Knowler WC: Depression, diabetes, and glycemic control in Pima Indians. *Diabetes Care* 27:618–619, 2004
12. Engum A, Mykletun A, Midthjell K, Holen A, Dahl A: Depression and diabetes: a large population-based study of sociodemographic, lifestyle, and clinical factors associated with depression in type 1 and type 2 diabetes. *Diabetes Care* 28:1904–1909, 2005
13. Lustman PJ, Griffith LS, Freedland KE, Kissel S, Clouse RE: Cognitive behavior therapy for depression in type 2 diabetes: a randomized, controlled trial. *Ann Intern Med* 129:613–621, 1998
14. Lustman PJ, Griffith LS, Clouse RE, Freedland KE, Eisen SA, Rubin EH, Carney RM, McGill JB: Effects of nortriptyline on depression and glycemic control in diabetes: results of a double-blind, placebo-controlled trial. *Psychosom Med* 59:241–250, 1997
15. Lustman PJ, Freedland KE, Griffith LS, Clouse RE: Fluoxetine for depression in diabetes: a randomized double-blind placebo-controlled trial. *Diabetes Care* 23:618–623, 2000
16. McBean AM, Shulin L, Gilbertson DT, Collins AJ: Differences in diabetes prevalence, incidence, and mortality among the elderly of four racial/ethnic groups: whites, blacks, Hispanics, and Asians. *Diabetes Care* 27:2317–2324, 2004
17. Harris MI, Flegal KM, Cowie CC, Eberhardt MS, Goldstein DE, Little RR, Wiedmeyer HM, Byrd-Holt DD: Prevalence of diabetes, impaired fasting glucose, and impaired glucose tolerance in U.S. adults: the third National Health and Nutrition Examination Survey, 1988–1994. *Diabetes Care* 21:518–524, 1998
18. Franse LV, Di Bari M, Shorr RI, Resnick HE, van Eijk JT, Bauer DC, Newman AB, Pahor M, the The Health, Aging and Body Composition Study Group: Type 2 diabetes in older well-functioning people: who is undiagnosed? *Diabetes Care* 24:2065–2070, 2001

19. Harris MI: Epidemiology of diabetes mellitus among elderly in the U.S. *Clin Geriatr Med* 6:703–719, 1990
20. Boyle JP, Honeycutt AA, Narayan KM, Hoerger TJ, Geiss LS, Chen H, Thompson TJ: Projection of diabetes burden through 2050: impact of changing demography and disease prevalence in the U.S. *Diabetes Care* 24:1936–1940, 2002
21. Wild S, Roglic G, Green A, Sicree R, King H: Global prevalence of diabetes: estimates for the year 2000 and projections for 2030. *Diabetes Care* 27:1047–1053, 2005
22. Gregg EW, Beckles GL, Williamson DF, Leveille SG, Langlois JA, Engelgau MM, Narayan KM: Diabetes and physical disability among older U.S. adults. *Diabetes Care* 23:1272–1277, 2000
23. Trief PM, Wade MJ, Pine D, Weinstock RS: A comparison of health-related quality of life of elderly and younger insulin-treated adults with diabetes. *Age Ageing* 32:613–618, 2003
24. Egede LE, Zheng D: Independent factors associated with major depressive disorder in a national sample of individuals with diabetes. *Diabetes Care* 26:104–111, 2003
25. Bell RA, Smith SL, Arcury TA, Snively BM, Stafford JM, Quandt SA: Prevalence and correlates of depressive symptoms among rural older African Americans, Native Americans, and whites with diabetes. *Diabetes Care* 28:823–829, 2005
26. Finkelstein EA, Bray JW, Chen H, Larson MJ, Miller K, Tompkins C, Keme A, Manderscheid R: Prevalence and costs of major depression among elderly claimants with diabetes. *Diabetes Care* 26:415–420, 2003
27. Williams JW Jr, Katon W, Lin EH, Noel PH, Worchel J, Cornell J, Harpole L, Fultz BA, Hunkeler E, Mika VS, Unutzer J: The effectiveness of depression care management on diabetes-related outcomes in older patients. *Ann Intern Med* 140:1015–1024, 2004
28. Shea S, Starren J, Weinstock RS, Knudson PE, Teresi J, Holmes D, Palmas W, Field L, Goland R, Ruck C, Hripesak G, Capps L, Liss D: Columbia University's Informatics for Diabetes Education and Telemedicine (IDEATel) Project: rationale and design. *J Am Med Inform Assoc* 9:49–62, 2002
29. Starren J, Hripesak G, Sengupta S, Abbruscato MSEE, Knudson PE, Weinstock RS, Shea S: Columbia University's Informatics for Diabetes Education and Telemedicine (IDEATel) Project: technical implementation. *J Am Med Inform Assoc* 9:25–36, 2002
30. Gurland BJ, Kuriansky JB, Sharpe L, Simon R, Stiller P, Birkett P: The Comprehensive Assessment and Referral Evaluation (CARE): rationale, development and reliability. *Intl J Aging Hum Dev* 8:9–42, 1977
31. Gurland N, Golden R, Teresi J, Challop J: The SHORT-CARE: an efficient instrument for the assessment of depression, dementia, and disability. *J Gerontol* 6:439–449, 1984
32. Teresi JA, Golden R, Gurland B: Concurrent and predictive validity of the indicator-scales developed for the Comprehensive Assessment and Referral Evaluation (CARE) interview. *J Gerontol* 39:158–165, 1984
33. Gurland B, Teresi J, McFate-Smith W, Black D, Hughes G, Edlavitch S: The effects of treating isolated systolic hypertension on cognitive status and depression in the elderly. *J Am Geriatr Soc* 36:1015–1022, 1988
34. Mann A, Graham N, Ashby D: Psychiatric illness in residential homes for the elderly: a survey in one London borough. *Age Ageing* 13:257–265, 1984
35. Charlson ME, Pompei P, Ales KL, MacKenzie CR: A new method of classifying prognostic comorbidity in longitudinal studies: development and validation. *J Chronic Dis* 40:373–383, 1987
36. Deyo RA, Cherkin DC, Cio MA: Adapting a clinical comorbidity index for use with ICD-9-CM administrative databases. *J Clin Epidemiol* 45:613–619, 1992
37. Newschaffer CJ, Bush TL, Penberthy LT: Comorbidity measurement in elderly female breast cancer patients with administrative and medical records. *J Clin Epidemiol* 50:725–733
38. Grootenhuys PA, Snoek FJ, Heine RJ, Bouter LM: Development of a type 2 diabetes symptom checklist: a measure of symptom severity. *Diabet Med* 11:253–261, 1994
39. Stoller EP: Elder-caregiving relationships in shared households. *Res Aging* 7:175–193, 1985
40. Lopez-Aguero W, Kemp B, Plopper M, Staples FR, Brummel-Smith K: Health needs of the Hispanic elderly. *J Am Ger Soc* 32:191–198, 1984
41. Shea S, Weinstock RS, Starren J, Teresi J, Palmas W, Field L, Morin P, Goland R, Izquierdo RE, Wolff LT, Ashraf M, Hillman C, Silver S, Meyer S, Holmes D, Petkova E, Capps L, Lantigua RA: A randomized trial comparing telemedicine case management with usual care in older, ethnically diverse, medically underserved patients with diabetes mellitus. *J Am Med Inform Assoc* 13:40–51, 2005
42. The Diabetes Prevention Program Research Group: Depression symptoms and antidepressant medicine use in Diabetes Prevention Program participants. *Diabetes Care* 28:830–837, 2005
